# Supplementary material for: Induction of Human iPSC-Derived Cardiomyocyte Proliferation Revealed by Combinatorial Screening in High Density Microbioreactor Arrays
Source: PubMed Central journal article supplement (PMC4838928; doi:10.1038/srep24637), 2016-04-21
Supplement: srep24637-s1.pdf [file srep24637-s1.pdf]

# Induction of Human iPSC-Derived Cardiomyocyte Proliferation Revealed by Combinatorial Screening in High Density Microbioreactor Arrays

## Supplementary Information

Drew M. Titmarsh<sup>a,b,#</sup>, Nick R. Glass<sup>a</sup>, Richard J. Mills<sup>b</sup>, Alejandro Hidalgo<sup>a</sup>, Ernst J. Wolvetang<sup>a</sup>, Enzo R. Porrello<sup>b</sup>, James E. Hudson<sup>b</sup>, Justin J. Cooper-White<sup>a,c,d,\*</sup>

<sup>a</sup>Australian Institute for Bioengineering & Nanotechnology, The University of Queensland, St. Lucia, QLD 4072, AUSTRALIA.

<sup>b</sup>School of Biomedical Sciences, The University of Queensland, St. Lucia, QLD 4072, AUSTRALIA.

<sup>c</sup>School of Chemical Engineering, The University of Queensland, St. Lucia, QLD 4072, AUSTRALIA.

<sup>d</sup>Biomedical Manufacturing, Manufacturing Flagship, CSIRO, Clayton, Victoria 3169, AUSTRALIA.

Correspondence should be addressed to:

Professor Justin J. Cooper-White

Australian Institute for Bioengineering & Nanotechnology

Building 75, Corner Cooper & College Roads

The University of Queensland

St. Lucia QLD 4072 AUSTRALIA

Phone: +61 7 334 63858

Fax: +61 7 334 63973

Email: j.cooperwhite@uq.edu.au

#Present address:

Institute of Medical Biology

Agency for Science, Technology and Research (A\*STAR)

8A Biomedical Grove

#06-06 Immunos

SINGAPORE 138648

Email: drew.titmarsh@imb.a-star.edu.sg

**Supplementary Table 1 - HDMA Physical Parameters**

| Parameter                                     | Unit                             | HDMA      | 96-well Plate | 24-well Plate |
|-----------------------------------------------|----------------------------------|-----------|---------------|---------------|
| <b>Single Culture Chamber Dimensions</b>      |                                  |           |               |               |
| Diameter                                      | mm                               | 0.513     | 6.35          | 15.5          |
|                                               | m                                | 5.13E-04  | 6.35E-03      | 1.55E-02      |
| Culture Area                                  | mm <sup>2</sup>                  | 0.207     | 31.7          | 188           |
|                                               | cm <sup>2</sup>                  | 2.07E-03  | 3.17E-01      | 1.88E+00      |
|                                               | m <sup>2</sup>                   | 2.07E-07  | 3.17E-05      | 1.88E-04      |
|                                               | mm <sup>2</sup>                  | 0.207     | 31.7          | 200           |
| Nominal Culture Area Specified                | cm <sup>2</sup>                  | 2.07E-03  | 3.17E-01      | 2.00E+00      |
|                                               | m <sup>2</sup>                   | 2.07E-07  | 3.17E-05      | 2.00E-04      |
|                                               | mm <sup>2</sup>                  | 0.207     | 31.7          | 200           |
| Height                                        | mm                               | 0.1       | 2.5           | 2.5           |
|                                               | m                                | 1.00E-04  | 2.52E-03      | 2.50E-03      |
| Nominal Volume                                | uL                               | 0.021     | 80            | 500           |
|                                               | mL                               | 2.07E-05  | 0.08          | 0.50          |
|                                               | m <sup>3</sup>                   | 2.07E-11  | 8.00E-08      | 5.00E-07      |
|                                               | mm <sup>2</sup> /mm <sup>3</sup> | 10        | 0.40          | 0.40          |
| Surface-Area-to-Volume (SAV) Ratio            | mm <sup>2</sup> /mm <sup>3</sup> | 10        | 0.40          | 0.40          |
| Plate to Bioreactor Concentration Factor      | -                                | 25        | 1.0           | 1.0           |
| Minimum Feature Size                          | mm                               | 0.05      |               |               |
| Maximum Feature Aspect Ratio (height/width)   | -                                | 2         |               |               |
| <b>Cell Seeding</b>                           |                                  |           |               |               |
| Nominal Cell Surface Density                  | /cm <sup>2</sup>                 | 4.00E+04  | 4.00E+04      | 4.00E+04      |
| Nominal Cell Seeding Suspension Concentration | /mL                              | 4.00E+06  | 1.59E+05      | 1.60E+05      |
| <b>HDMA Single Column Dimensions</b>          |                                  |           |               |               |
| Interconnect Width                            | mm                               | 0.08      |               |               |
| Rows                                          |                                  | 50        |               |               |
| Column Area (Wells only)                      | mm <sup>2</sup>                  | 10.3      |               |               |
|                                               | cm <sup>2</sup>                  | 0.103     |               |               |
| Total Column Area incl. Interconnects         | mm <sup>2</sup>                  | 10.6      |               |               |
|                                               | cm <sup>2</sup>                  | 0.106     |               |               |
| Volume                                        | uL                               | 1.06      |               |               |
| <b>HDMA Entire Culture Array Dimensions</b>   |                                  |           |               |               |
| Columns                                       |                                  | 162       |               |               |
| Nominal Culture Array Area                    | mm <sup>2</sup>                  | 1709      |               |               |
|                                               | cm <sup>2</sup>                  | 17.09     |               |               |
| Volume                                        | uL                               | 171       |               |               |
| <b>HDMA Entire Culture Array Dimensions</b>   |                                  |           |               |               |
| <b>Nominal Flow Conditions</b>                |                                  |           |               |               |
| Area per column                               | cm <sup>2</sup>                  | 0.106     |               |               |
| Flow                                          | uL/h/cm <sup>2</sup>             | 1         |               |               |
| Channel Flow                                  | uL/h                             | 0.148     |               |               |
|                                               | m <sup>3</sup> /s                | 4.12E-14  |               |               |
| Total Flow                                    | uL/h                             | 24.000    |               |               |
| Number of Syringes                            | -                                | 8         |               |               |
| Syringe Flow                                  | uL/h                             | 3.000     |               |               |
| <b><sup>a</sup>Reynolds Number, Re</b>        |                                  |           |               |               |
| Fluid Density                                 | kg/m <sup>3</sup>                | 1000      |               |               |
| Average Velocity (chamber)                    | m/s                              | 8.022E-07 |               |               |
| Average Velocity (interconnect)               | m/s                              | 4.115E-06 |               |               |
| Hydraulic Diameter (chamber)                  | m                                | 1.67E-04  |               |               |
| Hydraulic Diameter (interconnect)             | m                                | 1.00E-04  |               |               |

|                                                 |                   |          |
|-------------------------------------------------|-------------------|----------|
| Fluid Viscosity                                 | Pa.s              | 1.00E-03 |
| Re (chamber)                                    | -                 | 1.34E-04 |
| Re (interconnect)                               | -                 | 4.12E-04 |
| <b><sup>b</sup>Peclet Number, P<sub>e</sub></b> |                   |          |
| Diffusivity (O <sub>2</sub> )                   | m <sup>2</sup> /s | 3.30E-09 |
| Diffusivity (Glucose)                           | m <sup>2</sup> /s | 6.00E-10 |
| Diffusivity (Albumin)                           | m <sup>2</sup> /s | 7.00E-11 |
| Diffusivity (40kDa GF)                          | m <sup>2</sup> /s | 8E-11    |
| Pe (chamber) O <sub>2</sub>                     | -                 | 4.07E-02 |
| Pe (chamber) (Glucose)                          | -                 | 2.24E-01 |
| Pe (chamber) (Albumin)                          | -                 | 1.92E+00 |
| Pe (chamber) (GF)                               | -                 | 1.68E+00 |
| <b><sup>c</sup>Shear Stress, τ</b>              |                   |          |
| Shear stress (chamber)                          | Pa                | 4.81E-05 |
| Shear stress (interconnect)                     | Pa                | 9.88E-05 |
| <b>Fluid Flow and Replacement</b>               |                   |          |
| Mean Residence Time (Chamber)                   | h                 | 0.140    |
| Mean Residence Time (Column)                    | h                 | 7.12     |
| Space Velocity (Chamber)                        | /h                | 7.17     |
| Space Velocity (Column)                         | /h                | 0.140    |

### Notes

<sup>a</sup> Calculated as  $Re = \rho Q D_h / \mu A$ , where density ( $\rho$ ) =  $1 \times 10^3$  kg/m<sup>3</sup>;  $Q$  represents flowrate (m<sup>3</sup>/s);  $D_h$  represents hydraulic diameter; viscosity ( $\mu$ ) =  $10^{-3}$  Pa.s; and  $A$  represents cross-sectional area. Density and viscosity assumed as for water.

<sup>b</sup> Calculated as  $Pe = Q D_h / D_{AB} A$ , where  $D_{AB}$  represents the diffusion coefficient.

<sup>c</sup> Shear stress estimated as  $\tau = 6 \mu Q / h^2 w$ , where height ( $h$ ) =  $2.5 \times 10^{-4}$  m; and width ( $w$ ) =  $1.63 \times 10^{-3}$  m for chamber at full width and  $2.5 \times 10^{-4}$  m for chamber interconnect.

**A**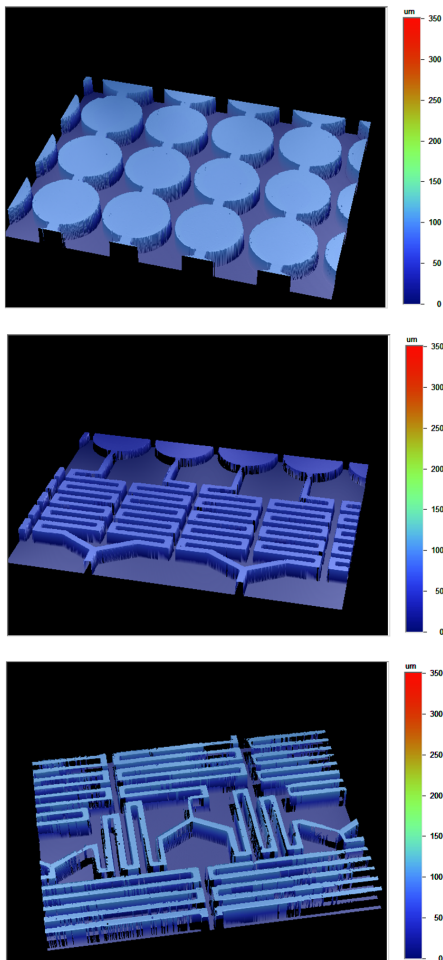**B**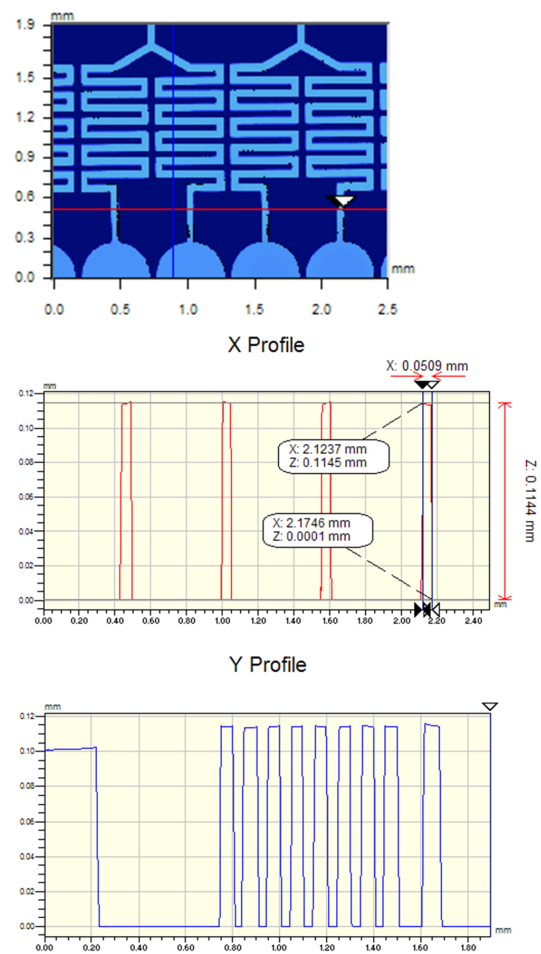

**Supplementary Figure 1 - Optical Surface Profilometry.** **A** 3D renderings of optical surface profiles of HDMA SU-8 masters. 2.5 mm x 1.9 mm sections of the cell culture array and fluidic channels are shown. **B** 2D representation and traced profiles showing height and width of microfabricated features (horizontal and vertical axes not in proportion).

**A****Nuclei Detection (Hoechst)**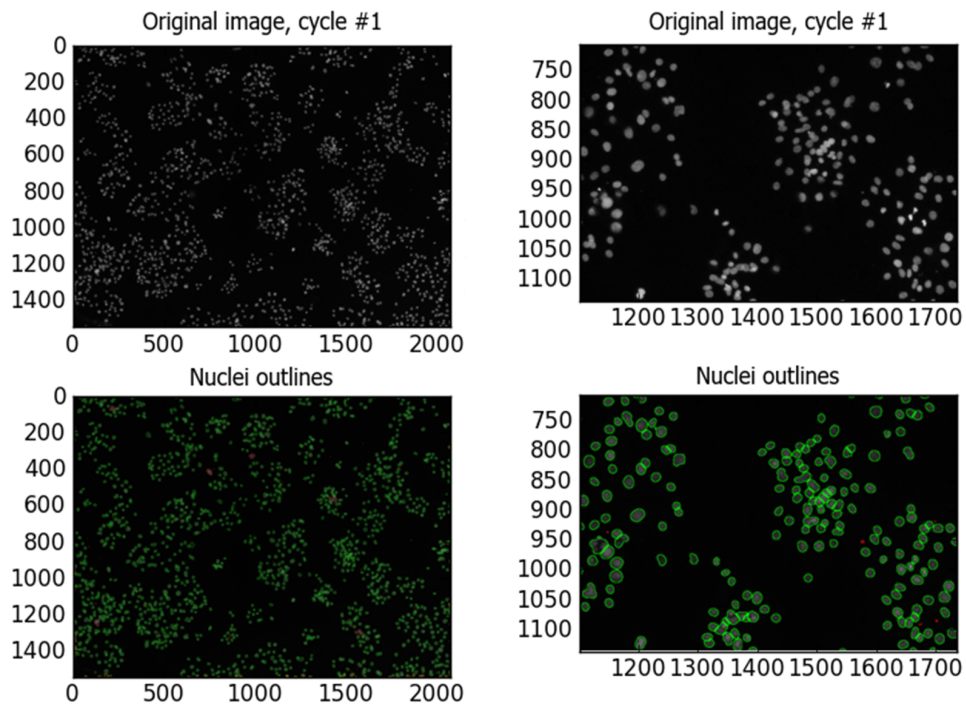**B****Cell Detection (cTnT)**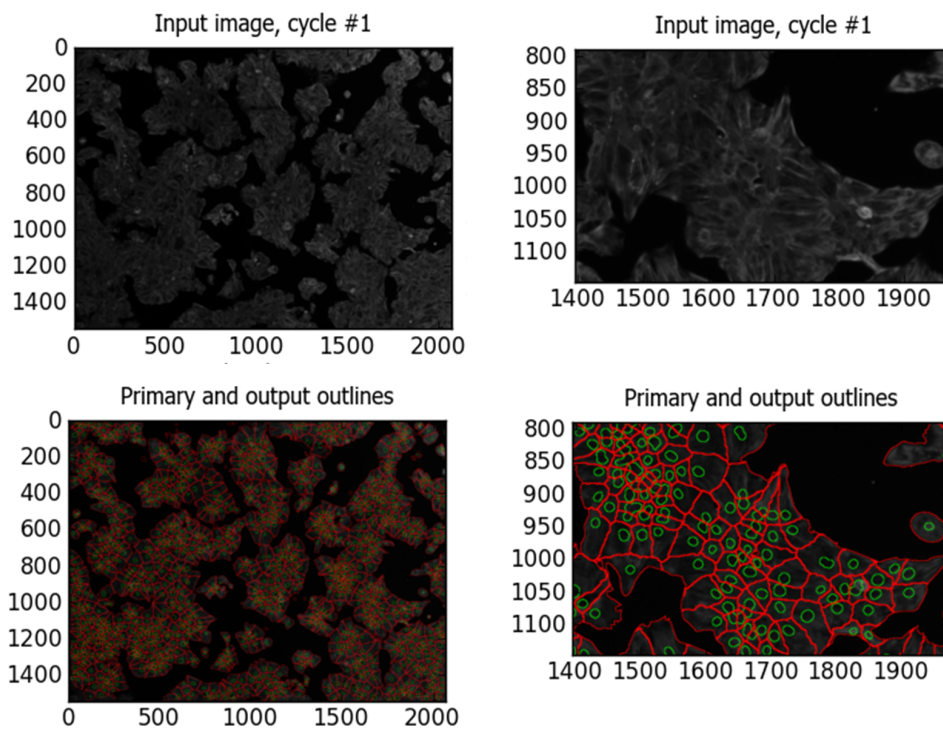

**Supplementary Figure 2 – Image Cytometry Processing by CellProfiler.** **A** CellProfiler input and output images for primary object (nuclei) identification, whole image and close-up, from static control experiments. **B** CellProfiler input and output images for secondary object (cell) identification, whole image and close-up, from static control experiments.

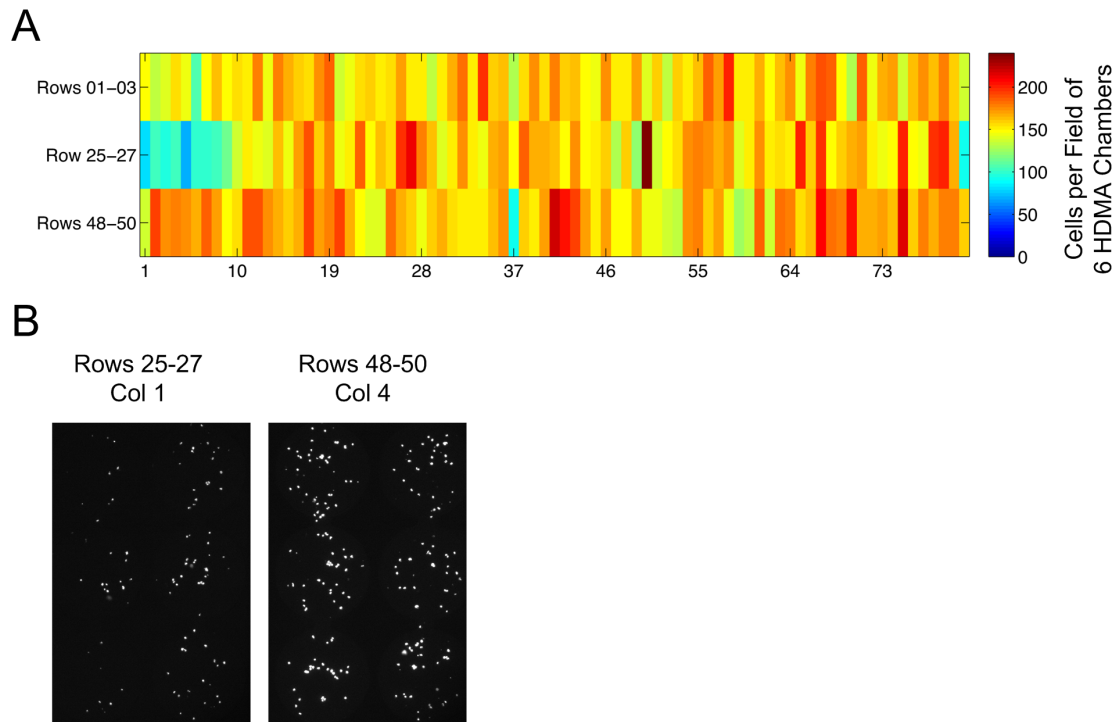

**Supplementary Figure 3 - Cell Seeding Distribution.** **A** Heatmap showing distribution of fixed, Hoechst-labelled HES3 hESCs after injection into HDMA at  $2 \times 10^6$  cells/mL. Image fields containing 6 HDMA chambers (three rows of one column pair) were acquired and nuclei counted by image cytometry. Sets of three rows were taken from the top (Rows 01-03), middle (Rows 25-27), and bottom (Rows 48-50) were measured. **B** Example images of a less dense (left), and normal density (right) condition.

**A**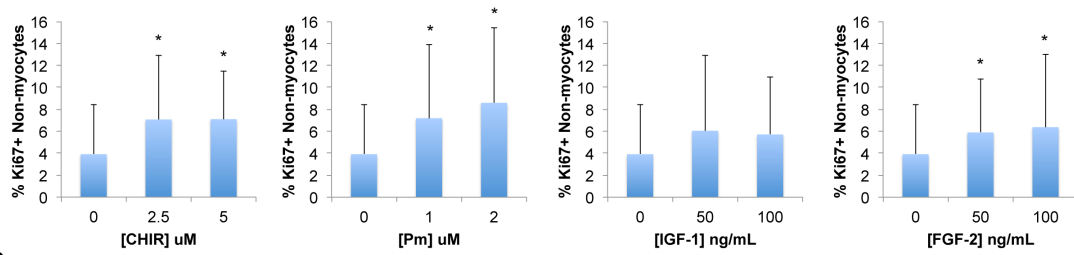**B**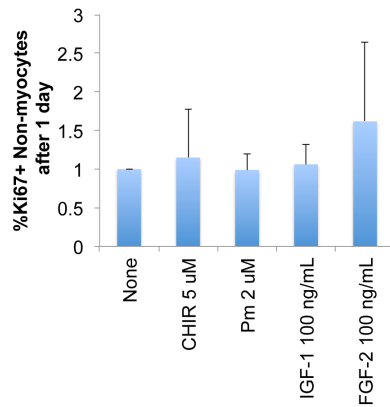

**Supplementary Figure 4 - Non-myocyte Proliferative Response in HDMA Screening.** **A** Data from individual column-pairs representing treatment with individual factors in HDMA. Bars represent mean and error bars represent S.D. of 50 rows from each column-pair where corresponding chambers in the 2 replicate columns are averaged. \* indicates  $p < 0.05$  versus control (no factors) by unpaired two-tailed  $t$ -test. **B** Quantification of percentage cTnT-Ki67<sup>+</sup> non-myocytes after 24 h treatment in static cultures. Bars represent mean +/- S.D. of 3 independent experiments including separate cardiomyocyte inductions, normalised to control (None) conditions. No treatments were significantly different (paired two-tailed  $t$ -test) against control conditions.

## **Supplementary Videos**

**Supplementary Video 1** – Assay startpoint, video of spontaneously contracting C32 iPSC-derived cardiomyocytes in HDMA.

**Supplementary Video 2** - Assay endpoint (3 days), video of spontaneously contracting C32 iPSC-derived cardiomyocytes in HDMA.
